# Supplementary material for: Granulocyte transfusions in severe aplastic anemia
Source: PubMed Central journal article supplement — Haematologica. 2023 Dec 7;109(6):1792–9. doi: 10.3324/haematol.2023.283826 (PMC11141686; doi:10.3324/haematol.2023.283826), 2023-12-07

# Granulocyte transfusions in severe aplastic anemia

Roma V. Rajput,<sup>1</sup> Vaani Shah,<sup>2</sup> Ruba N. Shalhoub,<sup>3</sup> Kamille West-Mitchell,<sup>4</sup> Nu Ri Cha,<sup>4</sup> Cathy Conry-Cantilena,<sup>4</sup> Susan F. Leitman,<sup>4</sup> David J. Young,<sup>5</sup> Brian Wells,<sup>6</sup> Georg Aue,<sup>6</sup> Cynthia E. Dunbar,<sup>5</sup> Bhavisha A. Patel,<sup>1</sup> Richard W. Childs,<sup>1</sup> Neal S. Young,<sup>1</sup> Colin O. Wu,<sup>3</sup> Emma M. Groarke<sup>1#</sup> and Shelley S. Kalsi<sup>2#</sup>

<sup>1</sup>Hematology Branch, National Heart, Lung, and Blood Institute, NHLBI; <sup>2</sup>Hematology Consult and Graduate Medical Section, NHLBI; <sup>3</sup>Office of Biostatistics Research, NHLBI; <sup>4</sup>Department of Transfusion Medicine, Clinical Center; <sup>5</sup>Translational Stem Cell Biology Branch, NHLBI and <sup>6</sup>Laboratory of Transplantation Immunotherapy, NHLBI, National Institutes of Health, Bethesda, MD, USA

*#EMG and SSK contributed equally as senior authors.*

**Correspondence:** R.V. Rajput  
[roma.rajput@nih.gov](mailto:roma.rajput@nih.gov)

**Received:** June 28, 2023.

**Accepted:** November 30, 2023.

**Early view:** December 7, 2023.

<https://doi.org/10.3324/haematol.2023.283826>

©2024 NIH (National Institutes of Health)

## Supplemental Data

### Granulocyte transfusion in severe aplastic anemia (SAA)

Roma V. Rajput<sup>1</sup>, Vaani Shah<sup>2</sup>, Ruba N. Shalhoub<sup>3</sup>, Kamille West-Mitchell<sup>4</sup>, Nuri Cha<sup>4</sup>, Cathy Conry-Cantilena<sup>4</sup>, Susan F. Leitman<sup>4</sup>, David J. Young<sup>5</sup>, Brian Wells<sup>6</sup>, Georg Aue<sup>6</sup>, Cynthia E. Dunbar<sup>5</sup>, Bhavisha A. Patel<sup>1</sup>, Richard W. Childs<sup>1</sup>, Neal S. Young<sup>1</sup>, Colin O. Wu<sup>3</sup>, Emma M. Groarke<sup>1\*</sup>, Shelley S. Kalsi<sup>2\*</sup>

### Table of Contents

|                                                                                                                                              |   |
|----------------------------------------------------------------------------------------------------------------------------------------------|---|
| <b>Supplemental Table 1.</b> Infection characteristics of severe aplastic anemia (SAA) patients receiving granulocyte transfusions (GTs)...  | 2 |
| <b>Supplemental Table 2.</b> Additional cox proportional hazards models for time to death from first GT.....                                 | 3 |
| <b>Supplemental Table 3.</b> Cases affected by human leukocyte antigen (HLA) alloimmunization .....                                          | 4 |
| <b>Supplemental Table 4.</b> Donor-specific antibody (DSA) raw data of impacted cases.....                                                   | 5 |
| <b>Supplemental Table 5.</b> Clinical outcomes of SAA patients who received GTs and underwent hematopoietic stem cell transplant (HSCT)..... | 6 |
| <b>Supplemental Figure 1.</b> Overall survival based on HLA alloimmunization status pre- and post-GT course .....                            | 7 |

**Supplemental Table 1:** Infection characteristics of 28 severe aplastic anemia patients receiving 30 granulocyte courses\**nocardia/aspergillus*(n=1), *sphingomonas/rhizomucor*(n=1), *stenotrophomonas/aspergillus* (n=1)

|                         | Number of Patients | Blood | Lung | CNS | Sinus | Skin/soft tissue | Multiple |
|-------------------------|--------------------|-------|------|-----|-------|------------------|----------|
| <b>Bacterial</b>        | 14                 |       |      |     |       |                  |          |
| <i>Klebsiella</i>       | 3                  | 2     |      |     |       |                  | 1        |
| <i>Escherichia coli</i> | 1                  |       |      |     |       |                  | 1        |
| <i>Serratia</i>         | 1                  |       |      |     |       |                  | 1        |
| <i>Pseudomonas</i>      | 1                  | 1     |      |     |       |                  | 1        |
| <i>Stenotrophomonas</i> | 2                  |       |      |     |       |                  | 2        |
| <i>Aeromonas</i>        | 1                  |       |      |     |       |                  |          |
| <i>Staphylococcus</i>   | 1                  |       |      |     |       |                  | 1        |
| <i>Streptococcus</i>    | 1                  |       |      |     |       |                  | 1        |
| <i>Enterococcus</i>     | 3                  | 1     |      |     |       |                  | 2        |
| <b>Fungal</b>           | 13                 |       |      |     |       |                  |          |
| <i>Culture negative</i> | 4                  |       | 4    |     |       |                  |          |
| <i>Aspergillus</i>      | 1                  |       | 1    |     |       |                  | 1        |
| <i>Exserohilum</i>      | 2                  |       |      |     | 1     | 1                |          |
| <i>Fusarium</i>         | 3                  |       |      |     |       |                  | 3        |
| <i>Rhizomucor</i>       | 1                  |       | 1    |     |       |                  |          |
| <i>Rhodoturula</i>      | 1                  |       |      |     |       |                  |          |
| <i>Trichosporon</i>     | 1                  |       | 1    |     |       |                  |          |
| <b>Mixed*</b>           | 3                  |       | 1    |     |       |                  | 1        |

**Supplemental Table 2.** Additional cox proportional hazards models for time to death from first granulocyte transfusion (GT) (N = 25)\* Kg: kilogram; HLA: human leukocyte antigen. \* Five courses omitted from analysis due to excessive missingness of recorded ANCs.

|                                                       | <b>Coefficient</b> | <b>Standard Error</b> | <b>Hazard Ratio</b> | <b>95% Confidence Interval</b> | <b>P-value</b> |
|-------------------------------------------------------|--------------------|-----------------------|---------------------|--------------------------------|----------------|
| <b>Granulocyte dose (cells/kg)</b>                    |                    |                       |                     |                                |                |
| <i>Median</i>                                         | 0.136              | 0.206                 | 1.15                | (0.77, 1.72)                   | 0.51           |
| <i>Max</i>                                            | 0.120              | 0.149                 | 1.13                | (0.84, 1.51)                   | 0.42           |
| <i>Cumulative</i>                                     | 0.008              | 0.010                 | 1.01                | (0.99, 1.03)                   | 0.39           |
| <b>HLA alloimmunization status pre-GT and post-GT</b> |                    |                       |                     |                                |                |
| <i>Negative-Negative</i>                              | --                 | --                    | 1                   | --                             |                |
| <i>Positive-Negative</i>                              | 0.299              | 0.711                 | 1.35                | (0.33, 5.44)                   | 0.67           |

**Supplemental Table 3.** Cases affected by human leukocyte antigen (HLA) alloimmunization. GT: granulocyte transfusion; AB: antibody; PRA: panel-reactive antibody.

| Subject | Age | Sex | HLA-AB testing date | Pre-GT course  |                        |                |                        |                     | Post GT course |                                |                |                                | Development of donor-specific antibodies |
|---------|-----|-----|---------------------|----------------|------------------------|----------------|------------------------|---------------------|----------------|--------------------------------|----------------|--------------------------------|------------------------------------------|
|         |     |     |                     | HLA AB Class 1 | HLA AB Class 1 PRA (%) | HLA AB Class 2 | HLA AB Class 2 PRA (%) | HLA-AB testing date | HLA AB Class 1 | HLA AB Class 1 PRA (%)         | HLA AB Class 2 | HLA AB Class 2 PRA (%)         |                                          |
| UPN-1   | 23  | M   | 10/26/2010          | N              | 0                      | N              | 0                      | 11/13/2010          | P              | 9                              | N              | 0                              | N                                        |
| UPN-3   | 16  | F   | 1/14/2011           | N              | 0                      | N              | 0                      | 2/7/2011            | P              | 18                             | P              | 49                             | Y                                        |
| UPN-4   | 56  | F   | 4/11/2011           | P              | 20                     | N              | 0                      | 11/16/2011          | N              | 0                              | P              | 17                             | N                                        |
| UPN-5   | 31  | F   | 4/12/2011           | P              | 7                      | P              | 77                     | 5/2/2011            | P              | 96                             | P              | 97                             | N                                        |
| UPN-10  | 9   | M   | 4/30/2012           | N              | 0                      | N              | 0                      | 7/26/2012           | P              | 29                             | P              | weak positive, no PRA reported | Y                                        |
| UPN-11  | 48  | F   | 5/2/2012            | N              | 0                      | P              | 17                     | 6/21/2012           | P              | 4                              | N              | 0                              | N                                        |
| UPN-16  | 6   | F   | 3/23/2016           | P              | 5                      | N              | 0                      | 5/18/2016           | P              | 16                             | P              | 29                             | Y                                        |
| UPN-18  | 7   | F   | 8/21/2017           | P              | 94                     | P              | 64                     | 9/21/2017           | P              | 47                             | P              | 94                             | Y                                        |
| UPN-21  | 30  | M   | 11/5/2018           | N              | 0                      | N              | 0                      | 12/17/2018          | P              | weak positive, no PRA reported | P              | weak positive, no PRA reported | N                                        |

**Supplemental Table 4.** Donor-specific antibody (DSA) raw data of impacted cases. MFI: Mean fluorescent intensity.

| Subject | Age | Sex | Granulocyte Course Dates | Total Granulocyte Courses | MFI for DSA to | Sample Date |           |           |           |           |          |          |
|---------|-----|-----|--------------------------|---------------------------|----------------|-------------|-----------|-----------|-----------|-----------|----------|----------|
|         |     |     |                          |                           |                |             |           |           |           |           |          |          |
| UPN-3   | 16  | F   | 01/14/2011-02/3/2011     | 9                         |                | 2/7/2011    | 3/2/2011  | 9/12/2011 |           |           |          |          |
|         |     |     |                          |                           | DQB1*03:02     | 11419       | 8299      | 2843      |           |           |          |          |
|         |     |     |                          |                           | DQB1*02:02     | 9560        | 4624      | 111       |           |           |          |          |
|         |     |     |                          |                           | DRB1*07:01     | 7210        | 2933      | 193       |           |           |          |          |
|         |     |     |                          |                           |                | 6/26/2012   | 7/7/2012  | 7/11/2012 | 7/19/2012 | 7/26/2012 | 8/2/2012 | 8/9/2012 |
| UPN-10  | 9   | M   | 04/30/2012-07/23/2012    | 39                        | A24            | 211         | 1061      | 921       | 372       | 1185      | 297      | 541      |
|         |     |     |                          |                           |                |             |           |           |           |           |          |          |
| UPN-16  | 6   | F   | 04/19/2016-05/17/2016    | 6                         |                | 5/11/2016   | 5/18/2016 | 5/25/2016 | 6/1/2016  |           |          |          |
|         |     |     |                          |                           | DQB1*03:01     | 6128        | 13898     | 14243     | 10929     |           |          |          |
|         |     |     |                          |                           |                |             |           |           |           |           |          |          |
| UPN-18  | 7   | F   | 08/22/2017-08/29/2017    | 3                         |                | 8/10/2017   | 8/21/2017 | 9/21/2017 |           |           |          |          |
|         |     |     |                          |                           | A*11:01        | 13804       | 12786     | 11015     |           |           |          |          |
|         |     |     |                          |                           | B*15:12        | 3142        | 1601      | 896       |           |           |          |          |
|         |     |     |                          |                           | C*03:03        | 1612        | 714       | 251       |           |           |          |          |
|         |     |     |                          |                           | DRB1*12:02     | 22576       | 25189     | 21139     |           |           |          |          |
|         |     |     |                          |                           | DRB3*03:01     | 20970       | 20970     | 11282     |           |           |          |          |
|         |     |     |                          |                           | DQB1*03:01     | 23326       | 26472     | 20803     |           |           |          |          |

**Supplemental Table 5:** SAA patients who received GTs and underwent HSCT. SAA: Severe aplastic anemia; GTs: Granulocyte transfusions; HSCT: Hematopoietic stem cell transplant; PBSC: Peripheral blood stem cell; Haplo-Cord: Haploidentical and umbilical cord; MRD: Matched related donor; MUD: Matched unrelated donor; NE: Never engrafted; N/A: not applicable. \*One prior haplo-cord with graft failure. \*\*One prior umbilical cord HSCT with graft failure. \*\*\*One prior MUD with graft failure.

| Subject   | Age | Sex | Type of HSCT  | Source    | GT course started pre- or post-HSCT | Number of GT products received | Engraftment (Y/N) | Time from Day 0 HSCT to engraftment (days) | Primary or Secondary Graft Failure (Y/N) | Alive at last recorded follow up (Y/N) | Time from Day 0 HSCT to death (days) | Cause of Death (if applicable) |
|-----------|-----|-----|---------------|-----------|-------------------------------------|--------------------------------|-------------------|--------------------------------------------|------------------------------------------|----------------------------------------|--------------------------------------|--------------------------------|
| UPN-1     | 23  | M   | Unknown       | Unknown   | Pre                                 | 8                              | Unknown           | Unknown                                    | Unknown                                  | N                                      | Unknown                              | Unknown                        |
| UPN-2     | 10  | F   | Haplo-Cord    | PBSC-Cord | Post                                | 1                              | Y                 | 9                                          | N                                        | Y                                      | N/A                                  | N/A                            |
| UPN-3     | 16  | F   | Haplo-Cord    | PBSC-Cord | Pre                                 | 9                              | Y                 | 10                                         | N                                        | Y                                      | N/A                                  | N/A                            |
| UPN-4     | 56  | F   | Unknown       | Unknown   | Pre                                 | 8                              | Unknown           | Unknown                                    | Unknown                                  | N                                      | Unknown                              | Unknown                        |
| UPN-5     | 31  | F   | MRD           | PBSC      | Pre                                 | 6                              | Y                 | 13                                         | N                                        | Y                                      | N/A                                  | N/A                            |
| UPN-6     | 17  | F   | Haplo-Cord    | PBSC-Cord | Pre                                 | 5                              | Y                 | 9                                          | N                                        | Y                                      | N/A                                  | N/A                            |
| UPN-7     | 29  | F   | MRD           | PBSC      | Pre                                 | 12                             | N                 | NE                                         | N                                        | N                                      | 6                                    | Infection                      |
| UPN-8     | 65  | F   | MRD           | PBSC      | Pre                                 | 20                             | Y                 | 44                                         | N                                        | N                                      | 584                                  | Respiratory Failure            |
| UPN-9     | 34  | M   | MRD           | PBSC      | Post                                | 4                              | Y                 | 14                                         | N                                        | N                                      | 46                                   | Infection                      |
| UPN-10*   | 9   | M   | MUD           | PBSC      | Pre                                 | 39                             | Y                 | 22                                         | N                                        | N                                      | 59                                   | Infection                      |
| UPN-11    | 48  | F   | MRD           | PBSC      | Pre                                 | 8                              | Y                 | 10                                         | N                                        | N                                      | 345                                  | Respiratory Failure            |
| UPN-12    | 17  | M   | MRD           | PBSC      | Pre                                 | 12                             | Y                 | 24                                         | N                                        | Y                                      | N/A                                  | N/A                            |
| UPN-13    | 16  | M   | Haplo-Cord    | PBSC-Cord | Pre                                 | 9                              | Y                 | 10                                         | N                                        | Y                                      | N/A                                  | N/A                            |
| UPN-14    | 16  | M   | Haplo-Cord    | PBSC-Cord | Pre                                 | 25                             | N                 | NE                                         | N                                        | N                                      | 21                                   | Infection                      |
| UPN-15    | 6   | F   | Haplo-Cord    | PBSC-Cord | Post                                | 8                              | Y                 | 6                                          | N                                        | Y                                      | N/A                                  | N/A                            |
| UPN-16    | 6   | F   | MUD           | PBSC      | Pre                                 | 6                              | Y                 | 18                                         | N                                        | Y                                      | N/A                                  | N/A                            |
| UPN-17    | 40  | F   | Haplo-Cord    | PBSC-Cord | Post                                | 1                              | N                 | NE                                         | N                                        | N                                      | 21                                   | Infection                      |
| UPN-18**  | 7   | F   | Haplo-Cord    | PBSC-Cord | Pre                                 | 3                              | Y                 | 15                                         | N                                        | N                                      | 38                                   | Infection                      |
| UPN-19*** | 7   | M   | MUD           | PBSC      | Post                                | 15                             | N                 | NE                                         | Y                                        | N                                      | 170                                  | Infection                      |
| UPN-20    | 15  | F   | Haplo-Cord    | PBSC-Cord | Pre                                 | 9                              | N                 | NE                                         | Y                                        | N                                      | 36                                   | N/A                            |
| UPN-21    | 30  | M   | MUD           | PBSC      | Pre                                 | 9                              | Y                 | 7                                          | N                                        | Y                                      | N/A                                  | N/A                            |
| UPN-22    | 27  | M   | Expanded cord | Cord      | Pre                                 | 6                              | N                 | NE                                         | Y                                        | N                                      | 62                                   | Infection                      |
| UPN-23    | 15  | M   | Haplo-Cord    | PBSC-Cord | Pre                                 | 22                             | Y                 | 20                                         | N                                        | Y                                      | N/A                                  | N/A                            |

**Supplemental Figure 1:** Overall survival based on HLA alloimmunization status pre- and post-granulocyte (GT) course. HLA: human leukocyte antigen; NN: negative pre-GT and post-GT; NP: negative pre-GT, positive post-GT; PN: positive pre-GT, negative post-GT, PP: positive pre-GT, positive post-GT.

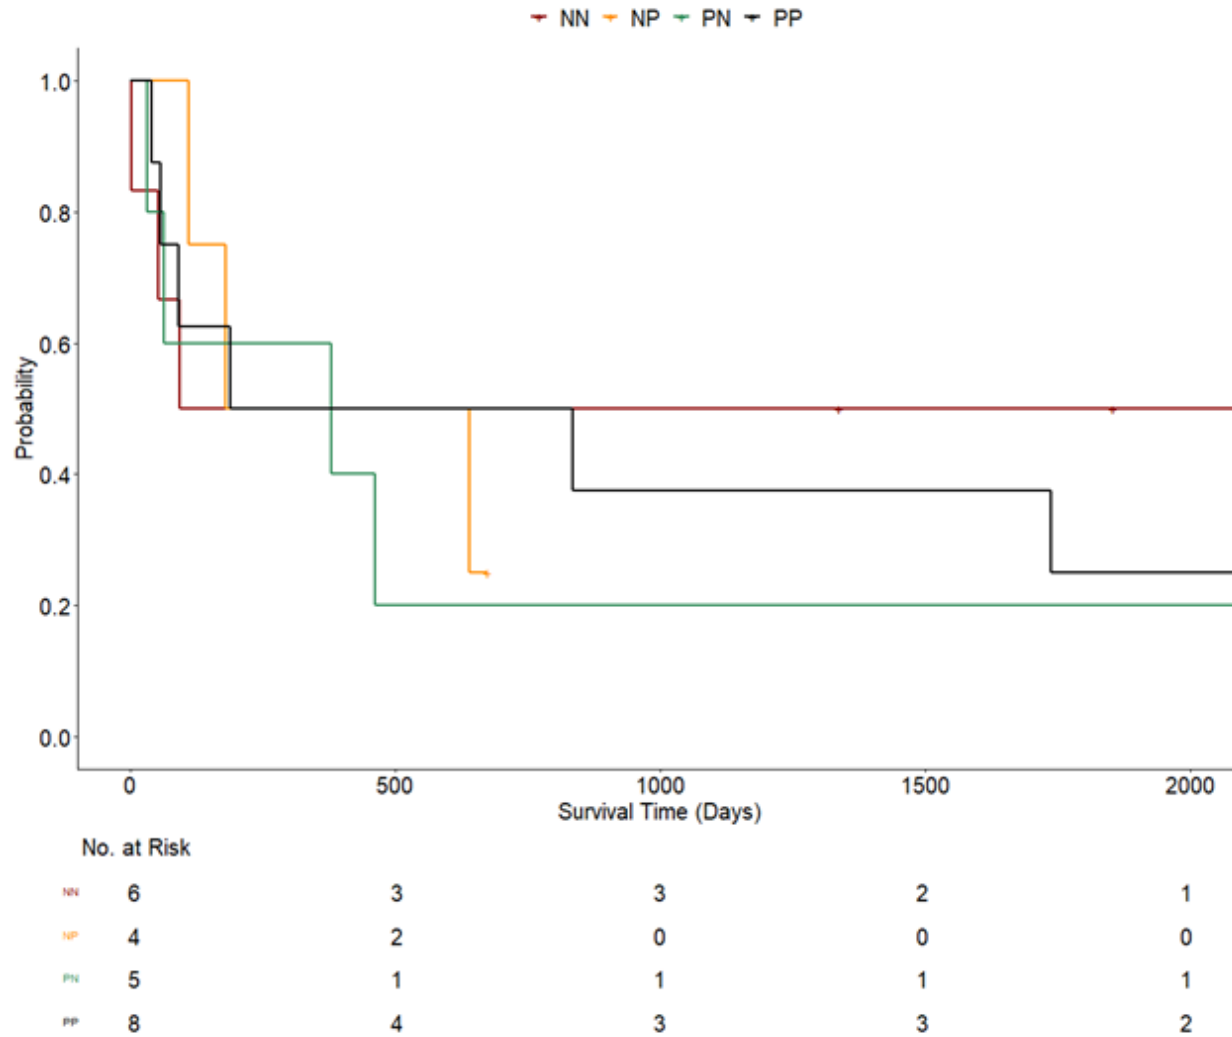

Supplement: 2023_283826_RAJPUT_SUPPL.pdf [file 2023_283826_RAJPUT_SUPPL.pdf]
